# Supplementary material for: A Clinical Study to Assess the Efficacy and Safety of MP-AzeFlu Nasal Spray in Comparison to Commercially Available Azelastine Hydrochloride and Fluticasone Propionate Nasal Sprays in Chinese Volunteers with Allergic Rhinitis
Source: Springer Nature journal article supplement (doi:10.1007/s41030-023-00238-8), 2023-08-14
Supplement: MOESM1 [file 25921308]

**A clinical study to assess the efficacy and safety of MP-AzeFlu (a fixed dose combination of Azelastine Hydrochloride and Fluticasone Propionate) nasal spray in comparison to commercially available azelastine hydrochloride and fluticasone propionate nasal sprays in Chinese volunteers with allergic rhinitis**

Bing Zhou<sup>1</sup>, Lei Cheng<sup>2</sup>, Jing Pan<sup>2</sup>, Huizhong Wang<sup>3</sup>, Yongde Jin<sup>4</sup>, Changqing Zhao<sup>5</sup>, Peng Lin<sup>6</sup>, Guolin Tan<sup>7</sup>, Hongyan Fang<sup>8</sup>, Hua Zhang<sup>9</sup>, Huifang Zhou<sup>10</sup>, Yaowu Dong<sup>11</sup>, Hans Christian Kuhl<sup>12</sup>, Rajesh Kumar R<sup>13</sup>, Duc Tung Nguyen<sup>12</sup>

1. Beijing Tongren Hospital, Capital Medical University, China
2. Tianjin Union Medical Center/Nankai University Affiliated Hospital, China
3. Central Hospital of Zibo, China
4. Yanbian University Hospital, China
5. The Second Affiliated Hospital of Shanxi Medical University, China
6. Tianjin First Central Hospital, China
7. The Third Xiangya Hospital of Central South University, China
8. Chongqing General Hospital, China
9. The 1st Affiliated Hospital of Xinjiang Medical University, China
10. Tianjin Medical University General Hospital, China
11. Tonghua Central Hospital, China
12. Global Clinical Sciences, MEDA Pharma GmbH & Co. KG (A Viatris Company), Germany
13. Mylan Pharmaceuticals Private Limited (Now Viatris), India

Corresponding author: Bing Zhou

**Running Title:**

Efficacy and safety of MP-AzeFlu in Chinese volunteers

**Corresponding authors details**

Dr Bing Zhou

Beijing Tongren Hospital, Capital Medical University

Beijing, China, 100051

Email: [entzhou@263.net](mailto:entzhou@263.net)

**Sup. Table 1 : Analysis of 12-hour rTNSS in AM and PM – ITT**

| <b>Variable<br/>Time Point</b>                              | <b>Treatment</b>        | <b>N</b>          | <b>Mean (S.D)</b>                            | <b>Source</b>                        | <b>p-Value</b>     | <b>Difference, 95%<br/>CI</b>                 |
|-------------------------------------------------------------|-------------------------|-------------------|----------------------------------------------|--------------------------------------|--------------------|-----------------------------------------------|
| rTNSS (AM)<br>Baseline                                      | MP-AzeFlu<br>Aze<br>Flu | 300<br>298<br>299 | 8.69(1.63)<br>8.64(1.72)<br>8.69(1.80)       | Treatment                            | 0.9231             |                                               |
| Day 2 to Day 7<br>Change from<br>Baseline of rTNSS<br>(AM)  | MP-AzeFlu<br>Aze<br>Flu | 300<br>298<br>298 | -2.77(2.67)<br>-1.61(2.52)<br>-2.30(2.78)    | MP-AzeFlu vs Aze<br>MP-AzeFlu vs Flu | <0.0001<br>0.0008  | -1.90 (-1.09, -0.50)<br>-2.19, (-0.80, -0.21) |
| Day 2 to Day 14<br>Change from<br>Baseline of rTNSS<br>(AM) | MP-AzeFlu<br>Aze<br>Flu | 300<br>298<br>299 | -3.74(2.95)<br>-2.26 (2.89)<br>-3.45 (3.19)  | MP-AzeFlu vs Aze<br>MP-AzeFlu vs Flu | <0.0001<br>0.0042  | -2.69(-1.22, -0.65)<br>-3.21(-0.70, -0.13)    |
| rTNSS (PM)<br>Baseline                                      | MP-AzeFlu<br>Aze<br>Flu | 300<br>298<br>299 | 8.52 (1.80)<br>8.49 (1.83)<br>8.51 (1.86)    | Treatment                            | 0.9869             |                                               |
| Day 2 to Day 7<br>Change from<br>Baseline of rTNSS<br>(PM)  | MP-AzeFlu<br>Aze<br>Flu | 300<br>298<br>298 | -3.01 (2.79)<br>-1.74 (2.77)<br>-2.51 (2.80) | MP-AzeFlu vs Aze<br>MP-AzeFlu vs Flu | <0.0001<br><0.0001 | -1.96(-1.37, -0.73)<br>-2.35(-0.98, -0.33)    |
| Day 2 to Day 14<br>Change from<br>Baseline of rTNSS<br>(PM) | MP-AzeFlu<br>Aze<br>Flu | 300<br>298<br>299 | -3.86 (3.05)<br>-2.35 (3.07)<br>-3.56 (3.14) | MP-AzeFlu vs Aze<br>MP-AzeFlu vs Flu | <0.0001<br>0.0006  | -2.66(-1.48, -0.86)<br>-3.28(-0.86, -0.24)    |

**Sup. Table 2: LS Mean change from baseline in rTNSS (AM + PM) scores during second day, first week and entire treatment period with MP-AzeFlu vs AZE vs Flu**

| <b>Variable<br/>Time Point</b>                     | <b>Treatment</b> | <b>LSM</b> | <b>SEM</b> | <b>Source</b>    | <b>p-Value</b> | <b>Treatment Difference<br/>(95% CI)</b> |
|----------------------------------------------------|------------------|------------|------------|------------------|----------------|------------------------------------------|
| Day 2                                              | MP-AzeFlu        | -3.5072    | 0.2241     |                  |                |                                          |
|                                                    | Aze              | -2.0904    | 0.2262     | MP-AzeFlu vs Aze | <0.0001        | -1.4167 (-2.0261, -0.8074)               |
|                                                    | Flu              | -2.1972    | 0.2251     | MP-AzeFlu vs Flu | <0.0001        | -1.3100 (-1.9187, -0.7012)               |
| Day 2 to Day 7<br>Change from<br>Baseline (AM+PM)  | MP-AzeFlu        | -5.6819    | 0.2251     |                  |                |                                          |
|                                                    | Aze              | -3.9476    | 0.2267     | MP-AzeFlu vs Aze | <0.0001        | -1.7343 (-2.3216, -1.1471)               |
|                                                    | Flu              | -4.5106    | 0.2261     | MP-AzeFlu vs Flu | <0.0001        | -1.1713 (-1.7585, -0.5841)               |
| Day 2 to Day 14<br>Change from<br>Baseline (AM+PM) | MP-AzeFlu        | -7.4275    | 0.2230     |                  |                |                                          |
|                                                    | Aze              | -5.4666    | 0.2245     | MP-AzeFlu vs Aze | <0.0001        | -1.9608 (-2.5270, -1.3947)               |
|                                                    | Flu              | -6.4468    | 0.2239     | MP-AzeFlu vs Flu | 0.0007         | -0.9807 (-1.5467, -0.4147)               |

**Sup. Table 3: LS Mean change from baseline in rTOSS (AM + PM) scores during second day, first week and entire treatment period with MP-AzeFlu vs AZE vs Flu**

| <b>Variable<br/>Time Point</b>                     | <b>Treatment</b> | <b>LSM</b> | <b>SEM</b> | <b>Source</b>    | <b>p-Value</b> | <b>Treatment Difference<br/>( 95% CI)</b> |
|----------------------------------------------------|------------------|------------|------------|------------------|----------------|-------------------------------------------|
| Day 2                                              | MP-AzeFlu        | -1.3265    | 0.1534     |                  |                |                                           |
|                                                    | Aze              | -0.9148    | 0.1544     | MP-AzeFlu vs Aze | 0.0527         | -0.4116 (-0.8281, 0.0048)                 |
|                                                    | Flu              | -0.6784    | 0.1546     | MP-AzeFlu vs Flu | 0.0024         | -0.6480 (-1.0651, -0.2309)                |
| Day 2 to Day 7<br>Change from<br>Baseline (AM+PM)  | MP-AzeFlu        | -2.4339    | 0.1481     |                  |                |                                           |
|                                                    | Aze              | -1.9322    | 0.1493     | MP-AzeFlu vs Aze | 0.0121         | -0.5017 (-0.8932, -0.1103)                |
|                                                    | Flu              | -1.7599    | 0.1489     | MP-AzeFlu vs Flu | 0.0008         | -0.6741 (-1.0656, -0.2826)                |
| Day 2 to Day 14<br>Change from<br>Baseline (AM+PM) | MP-AzeFlu        | -3.2573    | 0.1470     |                  |                |                                           |
|                                                    | Aze              | -2.7204    | 0.1481     | MP-AzeFlu vs Aze | 0.0056         | -0.5534 (-0.9160, -0.1578)                |
|                                                    | Flu              | -2.7039    | 0.1478     | MP-AzeFlu vs Flu | 0.0043         | -0.5534 ( -0.9326, -0.1743)               |

**Sup. Table 4: Frequent TEAEs by preferred term in any treatment group ( $\geq 1\%$ )**

| <b>Preferred Term</b>        | <b>MP-AzeFlu<br/>N= 301<br/>n %</b> | <b>AZE<br/>N= 298<br/>n %</b> | <b>FLU<br/>N= 299<br/>n %</b> |
|------------------------------|-------------------------------------|-------------------------------|-------------------------------|
| Dysgeusia                    | 13 (4.3)                            | 7 (2.3)                       | 1 (0.3)                       |
| Epistaxis                    | 4 (1.3)                             | 14 (4.7)                      | 5 (1.7)                       |
| Nasal dryness                | 3 (1.0)                             | 0 (0.0)                       | 2 (0.7)                       |
| Headache                     | 3 (1.0)                             | 3 (1.0)                       | 2 (0.7)                       |
| Somnolence                   | 2 (0.7)                             | 5 (1.7)                       | 1 (0.3)                       |
| Fatigue                      | 2 (0.7)                             | 3 (1.0)                       | 2 (0.7)                       |
| Application site<br>reaction | 2 (0.7)                             | 3 (1.0)                       | 0 (0.0)                       |
| Nasal mucosal<br>erosion     | 0 (0.0)                             | 3 (1.0)                       | 2 (0.7)                       |
| Dizziness                    | 0 (0.0)                             | 3 (1.0)                       | 0 (0.0)                       |
